# Supplementary material for: Phenotyping of single plant cells on a microfluidic cytometry platform with fluorescent, mechanical, and electrical modules
Source: Royal Society of Chemistry journal article supplement (doi:10.1039/d4an00682h), 2024-01-01
Supplement: d4an00682h1.pdf [file d4an00682h1.pdf]

## Supplementary Information

### **Phenotyping of single plant cells on a microfluidic cytometry platform with fluorescent, mechanical and electrical modules**

Shuaihua Zhang,<sup>†b</sup> Tianjiao Zhang,<sup>‡a</sup> Shuaiqi Wang,<sup>a</sup> Ziyu Han,<sup>b</sup> Xuexin Duan,<sup>\*b</sup> and Jiehua Wang,<sup>\*a</sup>

<sup>a</sup> *School of Environmental Science and Engineering, Tianjin University, Weijin Rd. 92, Tianjin 300072, China*

<sup>b</sup> *State Key Laboratory of Precision Measuring Technology and Instruments, College of Precision Instruments and Optoelectronics Engineering, Tianjin University, Weijin Rd. 92, Tianjin 300072, China*

<sup>\*</sup> *Correspondence: xduan@tju.edu.cn (X. Duan); jiehuawang@tju.edu.cn (J. Wang)*

<sup>†</sup> Electronic supplementary information (ESI) available

<sup>‡</sup> These authors contributed equally to this work

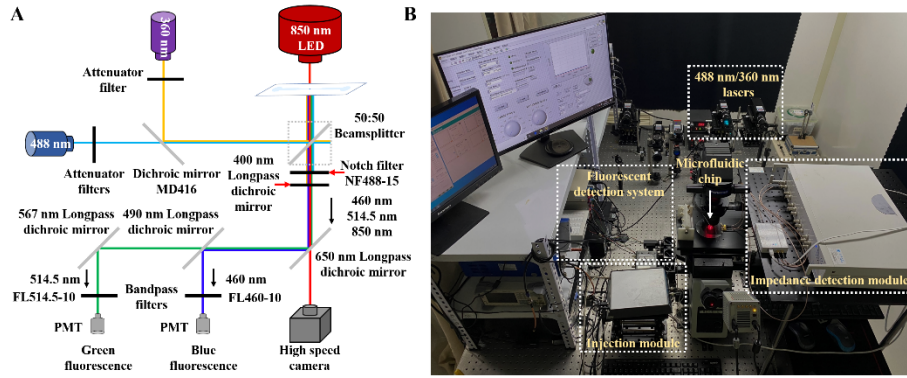

Figure S1 (A) The schematic diagram of the fluorescence detection and (B) the photos of the platform.

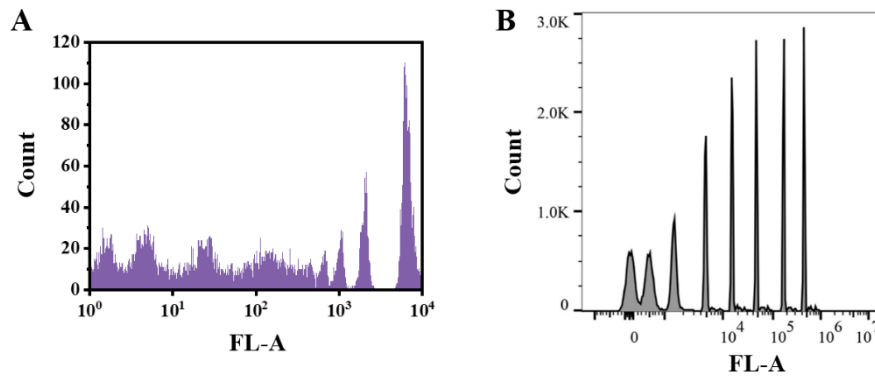

Figure S2 Comparison of (A) the proposed system with (B) commercial flow cytometry for the detection of microspheres with eight different fluorescence intensities.

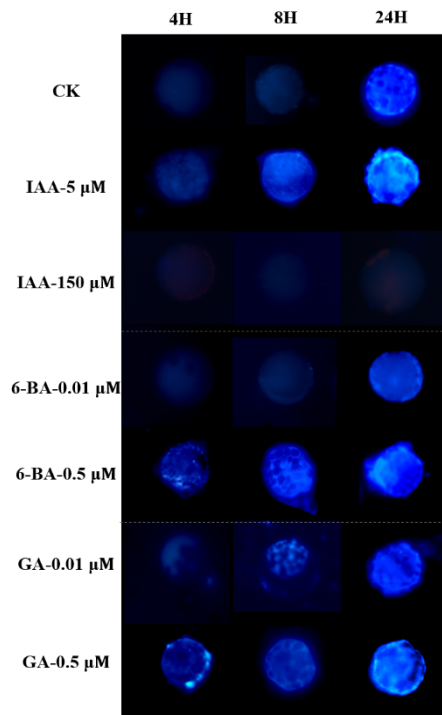

Figure S3 The microscopic fluorescence images of the primary cell wall (PCW) at different time points after treatment with exogenous phytohormones.

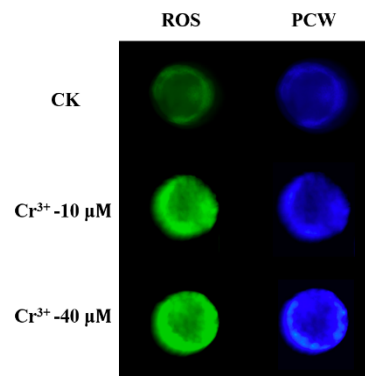

Figure S4 The microscopic fluorescence images of ROS and PCW of protoplasts treated with different concentrations of Cr<sup>3+</sup> for 12 hours.
